# 1 **Towards Personalized Breast Cancer Risk Management: A Thai** 2 **Cohort Study on Polygenic Risk Scores**

3  
4 Vorthunju Nakhonsri<sup>1</sup>, Manop Pithukpakorn<sup>2,3</sup>, Jakris Eu-ahsunthornwattana<sup>4</sup>, Chumpol  
5 Ngamphiw<sup>1</sup>, Rujipat Wasitthankasem<sup>1</sup>, Alisa Wilantho<sup>1</sup>, Pongsakorn Wangkumhang<sup>1</sup>, Manon  
6 Boonbangyang<sup>5</sup>, Sissades Tongsimas<sup>1\*</sup>

7  
8 <sup>1</sup> National Biobank of Thailand (NBT), National Center for Genetic Engineering and Biotechnology (BIOTEC),  
9 National Science and Technology Development Agency, Pathum Thani, 12120, Thailand

10 <sup>2</sup> Division of Medical Genetics, Department of Medicine, Faculty of Medicine Siriraj Hospital, Mahidol University,  
11 Bangkok, Thailand

12 <sup>3</sup> Siriraj Genomics, Faculty of Medicine Siriraj Hospital, Mahidol University, Bangkok, Thailand

13 <sup>4</sup> Department of Community Medicine, Faculty of Medicine Ramathibodi Hospital, Mahidol University, Bangkok,  
14 Thailand

15 <sup>5</sup> Professor Pornchai Matangkasombut Center for Microbial Genomics (CENMIG), Department of Microbiology,  
16 Faculty of Science, Mahidol University, Bangkok, Thailand

17 \*Corresponding author: Sissades Tongsimas([sissades.ton@biotec.or.th](mailto:sissades.ton@biotec.or.th))

18 **Short running title:** Population-Specific Validation of Polygenic Risk Scores for Breast Cancer in Thai  
19 Women

20

21

22

23

24

25

26

27

28

29

30

31

32

33

## 34 **Abstract**

35 Polygenic Risk Scores (PRS) are now playing an important role in predicting overall risk of  
36 breast cancer risk by means of adding contribution factors across independent genetic variants  
37 influencing the disease. However, PRS models may work better in some ethnic populations  
38 compared to others, thus requiring population-specific validation. This study evaluates the  
39 performance of 140 previously published PRS models in a Thai population, an underrepresented  
40 ethnic group. To rigorously evaluate the performance of 140 breast PRS models, we employed  
41 generalized linear models (GLM) combined with a robust evaluation strategy, including Five-  
42 fold cross validation and bootstrap analysis in which each model was tested across 1,000  
43 bootstrap iterations to ensure the robustness of our findings and to identify models with  
44 consistently strong predictive ability. Among the 140 models evaluated, 38 demonstrated robust  
45 predictive ability, identified through  $> 163$  bootstrap iterations (95% CI: 163.88). PGS004688  
46 exhibited the highest performance, achieving an AUROC of 0.5930 (95% CI: 0.5903–0.5957)  
47 and a McFadden's pseudo  $R^2$  of 0.0146 (95% CI: 0.0139–0.0153). Women in the 90<sup>th</sup> percentile  
48 of PRS had a 1.83-fold increased risk of breast cancer compared to those within the 30<sup>th</sup> to 70<sup>th</sup>  
49 percentiles (95% CI: 1.04–3.18). This study highlights the importance of local validation for PRS  
50 models derived from diverse populations, demonstrating their potential for personalized breast  
51 cancer risk assessment. Model PGS004688, with its robust performance and significant risk  
52 stratification, warrants further investigation for clinical implementation in breast cancer  
53 screening and prevention strategies. Our findings emphasize the need for adapting and utilizing  
54 PRS in diverse populations to provide more accessible public health solutions.

55 **Keywords:** Polygenic Risk Scores, Breast Cancer, Thai Population, PRS validation, Genetic Diversity

56

57

58

59

60

61

62

63

## 64 **Introduction**

65 Breast cancer is one of the main causes of death among women all over the world and is a  
66 multifactorial disease that depends on genetic and environmental factors [1]. Although some  
67 breast cancer cases are associated with strong penetrant mutations in genes such as *BRCA1* and  
68 *BRCA2*, most are associated with multiple low penetrant genetic variants [2]. This polygenic  
69 nature of breast cancer underscores the need for tools that can accurately assess an individual's  
70 cumulative genetic predisposition. Polygenic risk scores (PRS), which aggregate the effects of  
71 these numerous common genetic variants, have emerged as a promising tool in this regard. PRS  
72 offer a quantitative measure of an individual's genetic predisposition to breast cancer, potentially  
73 enabling more targeted screening and prevention strategies [3-4].

74 While the field of breast cancer PRS research is rapidly expanding, with over 140 models  
75 publicly available through repositories like the PGScatalog [5], a critical knowledge gap remains.  
76 The majority of these models were developed using data from Western populations, raising  
77 concerns about their accuracy and applicability across diverse ethnic groups [6]. Genetic and  
78 environmental variations between populations can significantly influence the performance of  
79 PRS, highlighting the urgent need for localized validation and adaptation of existing models.  
80 Furthermore, there is a lack of research on these models in Asian populations, especially in  
81 Southeast Asia. This absence in the development of PRS increases questions on the  
82 generalization of the current models to these groups. To fill this gap and facilitate the ability of  
83 PRS to accurately estimate breast cancer risk across ethnicities, regional studies, including this  
84 one involving a Thai cohort, are important [7-8]. This is crucial to ensure that PRS can  
85 effectively assess breast cancer risk in individuals from various backgrounds and ultimately  
86 contribute to more equitable and personalized healthcare.

87 This study aims to evaluate the performance of existing PRS models in a Thai cohort of breast  
88 cancer patients, contributing to a more comprehensive understanding of the generalizability and  
89 clinical utility of PRS for breast cancer risk assessment in diverse populations.

90

## 91 **Materials and Methods**

### 92 *Study Population*

93 This study utilized whole genome sequencing (WGS) data from 184 unrelated Thai  
94 women diagnosed with primary breast cancer who were treated at Siriraj Hospital. These data  
95 were obtained from previous studies, and the comprehensive case information was recently

96 published [9]. To focus on the polygenic contribution to breast cancer risk, 38 patients harboring  
97 pathogenic or likely pathogenic (P/LP) variants in known breast cancer genes were excluded  
98 from the analysis (see Supplementary Table S1). The control group consisted of WGS data from  
99 434 unrelated Thai individuals without cancer (Supplementary Table S2).

#### 100 *Polygenic Risk Score Acquisition and Calculation*

101 A total of 140 harmonized Polygenic Risk Scores (PRS) related to breast cancer  
102 (MONDO:0007254) were downloaded from the PGS Catalog on May 27<sup>th</sup> 2024 [5]. To ensure  
103 compatibility with variant call format (VCF) data derived from WGS sequences, these scores  
104 were adapted using an in-house pipeline which involved normalizing the effect alleles to the  
105 GRCh38 reference genome using the BCFtools plugin `fixref` [10] and adjusting the weight  
106 of the effect alleles aligned with the reference allele by multiplying them by -1. Each PRS was  
107 then calculated using the following formula:

$$108 \quad PGS_i = \sum_{j=1}^M \beta_j \times dosage_{ij}$$

109  
110 where  $PGS_i$  represents the polygenic score for the  $i^{\text{th}}$  individual,  $\beta_j$  is the weight of the alternate  
111 allele at the locus  $j$ , and  $dosage_{ij}$  is the genotype dosage at that locus for the individual  $i$ .

#### 112 *Statistical Analysis*

113 To assess the robustness and generalizability of the PRS models, we employed a bootstrap  
114 analysis. In each of 1,000 bootstrap iterations, we randomly sampled 128 breast cancer cases and  
115 128 controls to form a training set. Five-fold cross-validation was applied within this training set  
116 to identify the best-performing model for each iteration. Model performance was evaluated using  
117 McFadden's Pseudo  $R^2$  and the log-likelihood ratio p-value to assess goodness of fit [11]. The  
118 Area Under the Receiver Operating Characteristic Curve (AUROC) was calculated to evaluate  
119 the discriminatory ability of each model within an independent test set comprising 56 breast  
120 cancer patients and 306 controls. Models were ranked based on the frequency of achieving a  
121 statistically significant log-likelihood ratio p-value ( $<0.05$ ) across the 1,000 bootstrap iterations.  
122 The final best-performing model was selected based on the average McFadden's Pseudo  $R^2$  and  
123 AUROC values across all iterations. All statistical analyses were performed using the R  
124 programming environment [12-15].

#### 125 *Language and Computational Tools*

126 This manuscript was refined using the language model ChatGPT for linguistic and  
127 structural improvement of the text. [16]

## 128 Results

### 129 *Performance of Polygenic Risk Scores in Predicting Breast Cancer Risk*

130 A comprehensive bootstrap analysis was conducted on 140 PRS models, using 1,000  
131 iterations to evaluate their ability to predict breast cancer status. Results indicated that, on  
132 average, each model demonstrated a statistically significant association with breast cancer status  
133 in 142.76 out of the 1000 bootstrap iterations (95% confidence interval: 122.57–163.88). A  
134 detailed breakdown of the performance of each model across the bootstrap iterations is provided  
135 in Supplementary Table S3, and a visual representation of the distribution of significant  
136 associations is shown in Figure 1A.

137

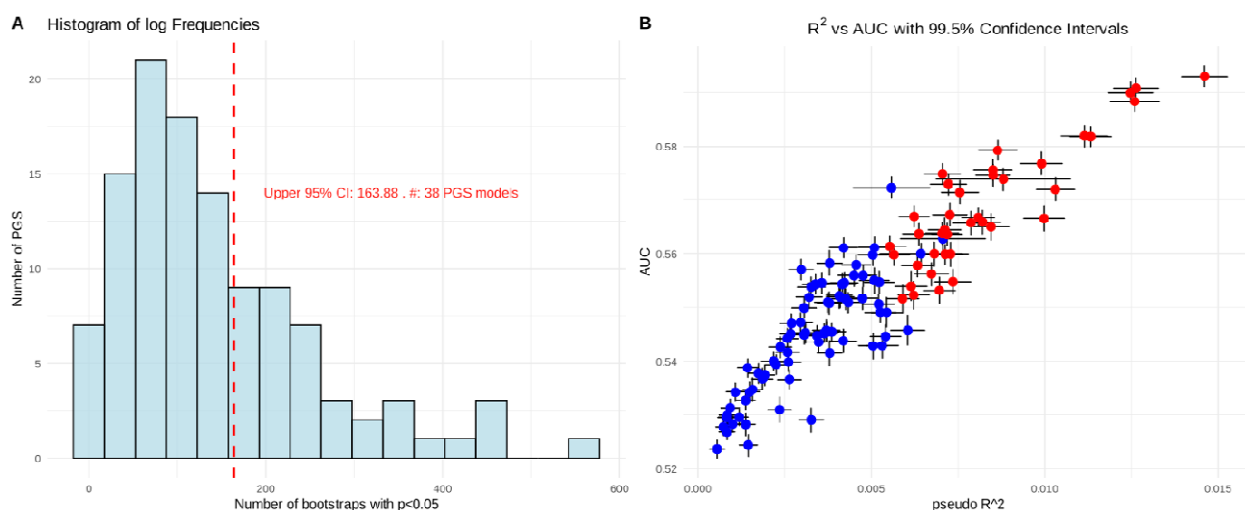

138

### 139 **Figure 1: Bootstrap Performance of Polygenic Risk Scores for Breast Cancer Prediction**

140 **(A) Distribution of Significant Associations:** Histogram displaying the number of bootstrap  
141 iterations (out of 1,000) in which each of the 140 PRS models achieved a statistically  
142 significant association with breast cancer status (p-value < 0.05). The red dashed line indicates  
143 the upper 95% confidence interval (163.88 iterations), highlighting models with frequent  
144 significant results. **(B) Predictive Performance and Consistency:** Scatter plot illustrating the  
145 relationship between McFadden's Pseudo R<sup>2</sup> and Area Under the Receiver Operating  
146 Characteristic Curve (AUROC) for each PRS model. Red dots represent models achieving  
147 significance in over 95% of bootstrap iterations, indicating high predictive consistency.

148

149 To further evaluate the performance, we plotted McFadden's Pseudo R<sup>2</sup> against AUROC  
150 for each model, including 95% confidence intervals (Figure 2A). This analysis identified

151 PGS004688 as the top-performing model, demonstrating the highest average AUROC (0.5930;  
152 95% CI: 0.5903–0.5957) and Pseudo R<sup>2</sup> (0.0146; 95% CI: 0.0139–0.0153). Figure 2B provides a  
153 detailed visualization of the 1,000 bootstrap iterations for PGS004688, with a green square  
154 highlighting the mean  $\pm$  95% CI of both train and test AUROC values.

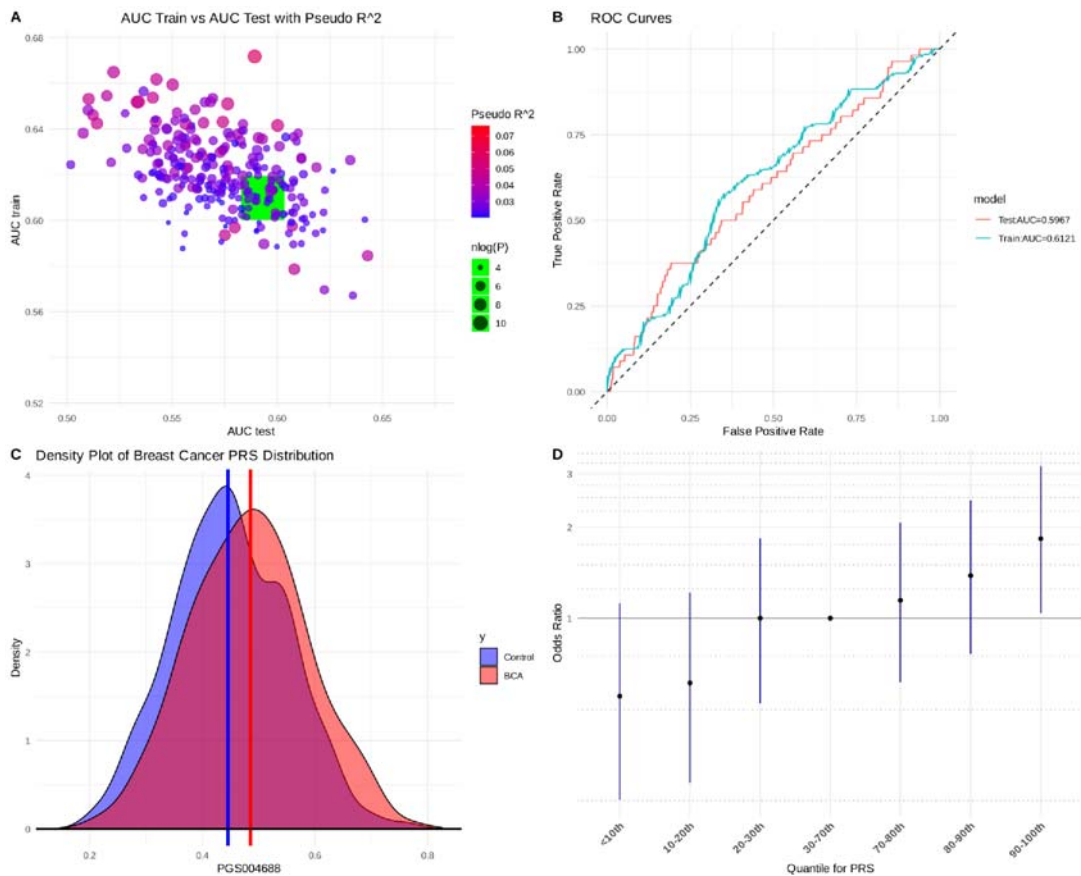

155  
156 **Figure 2: PGS004688: Predictive Accuracy and Consistency**  
157 (A) Scatter plot depicting McFadden's Pseudo R<sup>2</sup> versus AUROC for each PRS model.  
158 PGS004688 is highlighted, with a green square indicating the mean and 95% confidence interval  
159 of AUROC values. (B) ROC curves for PGS004688, comparing performance in the training  
160 (green) and testing (red) datasets to demonstrate model consistency. (C) Density plot illustrating  
161 the distribution of standardized PGS004688 scores in breast cancer patients (red) and controls  
162 (blue), with median scores indicated. (D) Forest plot displaying odds ratios for breast cancer risk  
163 at different PGS004688 quantiles. Notably, individuals with scores above the 90th percentile  
164 exhibit a significantly elevated risk (odds ratio = 1.83; 95% CI: 1.04–3.18), highlighting the  
165 potential clinical utility of PGS004688 for risk stratification.

166

167

## 168 **Discussion**

169 This study underlies the crucial need for population-specific validation of Polygenic Risk  
170 Scores (PRS), for accurate breast cancer risk management. Our findings demonstrate that PRS  
171 performance can vary significantly across different ethnicities due to variations in genetic  
172 diversity and allele frequencies [6]. This discrepancy is particularly evident when comparing  
173 European ancestry populations to more genetically diverse populations. While resources like the  
174 PGScatalog, containing over 4,000 PRS from over 600 studies, are invaluable, our study  
175 highlights the challenges of applying models developed in one population to another.

176 To address this, we adapted 140 breast cancer-related PRS for use with our Thai cohort.  
177 We employed rigorous cross-validation and bootstrap methods to ensure robust model  
178 generalization. Notably, we identified PGS004688 as the most effective PRS for predicting  
179 breast cancer risk in Thai women. Interestingly, despite being originally developed using GWAS  
180 data from a predominantly European cohort [17-18], PGS004688 outperformed models  
181 specifically developed for East Asian populations [19-20]. This finding underscores the  
182 complexity of PRS transferability and the need for population-specific validation. While  
183 PGS004688 demonstrated superior performance in our Thai cohort, its effectiveness was lower  
184 than its reported performance in European ancestry cohorts (AUROC = 0.665) [18]. This  
185 disparity emphasizes the need for continued research and validation of PRS in diverse  
186 populations. Further investigation in larger Thai cohorts is crucial to confirm the clinical utility  
187 of Ensuring the clinical utility of PGS004688 and ensure its reliability for breast cancer risk  
188 assessment in Thailand.

189

## 190 **Conclusion**

191 This study highlights the critical need for population-specific validation of Polygenic  
192 Risk Score (PRS) for accurate breast cancer risk assessment. Our findings demonstrate that PRS  
193 performance can vary significantly across different ethnicities due to variations in genetic  
194 diversity and allele frequencies. While resources like the PGScatalog are invaluable, our study  
195 reflects the challenges of applying models developed in one population to another. We identified  
196 PGS004688 as the most effective PRS for predicting breast cancer risk in Thai women,  
197 outperforming models specifically developed for East Asian populations. This finding reveals the  
198 complexity of PRS transferability and the need for continued research and validation in diverse  
199 populations. Further investigation in larger Thai cohorts is imperative to confirm the clinical  
200 utility of PGS004688 and ensure its reliability for breast cancer risk assessment in Thailand.



201  
202  
203  
204  
205  
206  
207  
208  
209  
210  
211  
212  
213  
214  
215  
216  
217  
218  
219  
220  
221  
222  
223  
224  
225  
226  
227  
228  
229  
230  
231  
232  
233

## References

1. World Health Organization. (2024, March 13). Breast cancer. Retrieved from <https://www.who.int/news-room/fact-sheets/detail/breast-cancer>
2. Gaudet MM, Kirchhoff T, Green T, Vijai J, Korn JM, Guiducci C, et al. Common Genetic Variants and Modification of Penetrance of BRCA2-Associated Breast Cancer. *PLoS Genet.* 2010 Oct;6(10). doi: 10.1371/journal.pgen.1001183. PMID: 20975944; PMCID: PMC2951372.
3. Lewis, C.M., Vassos, E. Polygenic risk scores: from research tools to clinical instruments. *Genome Med* 12, 44 (2020). <https://doi.org/10.1186/s13073-020-00742-5>
4. Roberts E, Howell S, Evans DG. Polygenic risk scores and breast cancer risk prediction. *Breast.* 2023 Feb;67:71-77. doi: 10.1016/j.breast.2023.01.003. Epub 2023 Jan 10. PMID: 36646003; PMCID: PMC9982311.
5. Lambert, S.A., Gil, L., Jupp, S. et al. The Polygenic Score Catalog as an open database for reproducibility and systematic evaluation. *Nat Genet* 53, 420–425 (2021). <https://doi.org/10.1038/s41588-021-00783-5>
6. Duncan, L., Shen, H., Gelaye, B. et al. Analysis of polygenic risk score usage and performance in diverse human populations. *Nat Commun* 10, 3328 (2019). <https://doi.org/10.1038/s41467-019-11112-0>
7. Ho WK, Tai MC, Dennis J, Shu X, Li J, Ho PJ, Millwood IY, Lin K, Jee YH, Lee SH, Mavaddat N, Bolla MK, Wang Q, Michailidou K, Long J, Wijaya EA, Hassan T, Rahmat K, Tan VKM, Tan BKT, Tan SM, Tan EY, Lim SH, Gao YT, Zheng Y, Kang D, Choi JY, Han W, Lee HB, Kubo M, Okada Y, Namba S; BioBank Japan Project; Park SK, Kim SW, Shen CY, Wu PE, Park B, Muir KR, Lophatananon A, Wu AH, Tseng CC, Matsuo K, Ito H, Kwong A, Chan TL, John EM, Kurian AW, Iwasaki M, Yamaji T, Kweon SS, Aronson KJ, Murphy RA, Koh WP, Khor CC, Yuan JM, Dorajoo R, Walters RG, Chen Z, Li L, Lv J, Jung KJ, Kraft P, Pharoah PDB, Dunning AM, Simard J, Shu XO, Yip CH, Taib NAM, Antoniou AC, Zheng W, Hartman M, Easton DF, Teo SH. Polygenic risk scores for prediction of breast cancer risk in Asian populations. *Genet Med.* 2022 Mar;24(3):586-600. doi: 10.1016/j.gim.2021.11.008. Epub 2021 Dec 15. PMID: 34906514; PMCID: PMC7612481.
8. Ho, WK., Tan, MM., Mavaddat, N. et al. European polygenic risk score for prediction of breast cancer shows similar performance in Asian women. *Nat Commun* 11, 3833 (2020). <https://doi.org/10.1038/s41467-020-17680-w>



- 234 9. Lertwilaiwittaya P, Roothumnong E, Nakthong P, Dungort P, Meesamarnpong C, Tansa-Nga  
235 W, Pongsuktavorn K, Wiboonthanasarn S, Tititumjariya W, Thongnoppakhun W,  
236 Chanprasert S, Limwongse C, Pithukpakorn M. Thai patients who fulfilled NCCN criteria  
237 for breast/ovarian cancer genetic assessment demonstrated high prevalence of germline  
238 mutations in cancer susceptibility genes: implication to Asian population testing. *Breast*  
239 *Cancer Res Treat.* 2021 Jul;188(1):237-248. doi: 10.1007/s10549-021-06152-4. Epub 2021  
240 Mar 1. PMID: 33649982; PMCID: PMC8233261.
- 241 10. Petr Danecek, James K Bonfield, Jennifer Liddle, John Marshall, Valeriu Ohan, Martin O  
242 Pollard, Andrew Whitwham, Thomas Keane, Shane A McCarthy, Robert M Davies, Heng  
243 Li, Twelve years of SAMtools and BCFtools, *GigaScience*, Volume 10, Issue 2, February  
244 2021, giab008, <https://doi.org/10.1093/gigascience/giab008>
- 245 11. McFadden D. Conditional logit analysis of qualitative choice behavior. *Frontiers in*  
246 *Econometrics.* 1973:105–142.
- 247 12. R Core Team (2023). *\_R: A Language and Environment for Statistical Computing.* R  
248 Foundation for Statistical Computing, Vienna, Austria. <<https://www.R-project.org/>>.
- 249 13. Wickham H, Averick M, Bryan J, Chang W, McGowan LD, François R, Golemund G,  
250 Hayes A, Henry L, Hester J, Kuhn M, Pedersen TL, Miller E, Bache SM, Müller K, Ooms J,  
251 Robinson D, Seidel DP, Spinu V, Takahashi K, Vaughan D, Wilke C, Woo K, Yutani H  
252 (2019). “Welcome to the tidyverse.” *Journal of Open Source Software*, \*4\*(43), 1686.  
253 doi:10.21105/joss.01686.
- 254 14. H. Wickham. *ggplot2: Elegant Graphics for Data Analysis.* Springer-Verlag New York, 2016.
- 255 15. Xavier Robin, Natacha Turck, Alexandre Hainard, Natalia Tiberti, Frédérique Lisacek, Jean-  
256 Charles Sanchez and Markus Müller (2011). *pROC: an open-source package for R and S+*  
257 *to analyze and compare ROC curves.* *BMC Bioinformatics*, 12, p. 77. DOI: 10.1186/1471-  
258 2105-12-77
- 259 16. OpenAI. 2023. "ChatGPT." Accessed June 3, 2023. <https://www.openai.com/chatgpt>.
- 260 17. Zhang H, Ahearn TU, Lecarpentier J, et al. Genome-wide association study identifies 32  
261 novel breast cancer susceptibility loci from overall and subtype-specific analyses. *Nature*  
262 *Genetics.* 2020 Jun;52(6):572-581. DOI: 10.1038/s41588-020-0609-2. PMID: 32424353;  
263 PMCID: PMC7808397.
- 264 18. Hu J, Ye Y, Zhou G, Zhao H. Using clinical and genetic risk factors for risk prediction of 8  
265 cancers in the UK Biobank. *JNCI Cancer Spectr.* 2024 Feb 29;8(2):pkae008. doi:  
266 10.1093/jncics/pkae008. PMID: 38366150; PMCID: PMC10919929.

- 267 19. Shieh Y, Hu D, Ma L, Huntsman S, Gard CC, Leung JW, Tice JA, Vachon CM, Cummings  
268 SR, Kerlikowske K, Ziv E. Breast cancer risk prediction using a clinical risk model and  
269 polygenic risk score. *Breast Cancer Res Treat.* 2016 Oct;159(3):513-25. doi:  
270 10.1007/s10549-016-3953-2. Epub 2016 Aug 26. PMID: 27565998; PMCID: PMC5033764.
- 271 20. Wen W, Shu XO, Guo X, Cai Q, Long J, Bolla MK, Michailidou K, Dennis J, Wang Q, Gao  
272 YT, Zheng Y, Dunning AM, García-Closas M, Brennan P, Chen ST, Choi JY, Hartman M, Ito  
273 H, Lophatananon A, Matsuo K, Miao H, Muir K, Sangrajrang S, Shen CY, Teo SH, Tseng  
274 CC, Wu AH, Yip CH, Simard J, Pharoah PD, Hall P, Kang D, Xiang Y, Easton DF, Zheng W.  
275 Prediction of breast cancer risk based on common genetic variants in women of East Asian  
276 ancestry. *Breast Cancer Res.* 2016 Dec 8;18(1):124. doi: 10.1186/s13058-016-0786-1.  
277 PMID: 27931260; PMCID: PMC5146840.
